# Supplementary material
Source: Springer Nature journal article supplement (https://www.springermedizin.de/resource/supplementary/12911_2013_782_MOESM1_ESM.pdf/9526780)
Supplement: MOESM1 [file 9526780]

### Stage 1

Citations identified, n=2409  
MEDLINE (358), AMED (2),  
PsychINFO (34), EMBASE (460),  
CINAHL (200), SCOPUS (313), Web  
of Knowledge (217), Cochrane Library  
(482), Dissertations and theses (51),  
OpenGrey (214), NNR (64),  
ISTCTNR (14)

Excluded, n=873 duplicates

Titles screened, n=1536

Excluded, n=1441

### Stage 2

Abstracts screened, n=95

Cochrane systematic review  
(latest version), n=1

Papers identified from  
thesis (1), n=1

Papers identified from  
registered trial (1), n=1

Excluded references:

- Theses, n=5
- Registered trials, n=11
- Withdrawn versions of a  
Cochrane review, n=2
- Books, n=2
- Conference papers, n=2
- Study/review papers,  
n=62

### Stage 3

Abstracts of study (9)  
and review papers (5) screened, n=14

Papers identified from reference  
lists of review papers, n=7

### Stage 4

Abstracts of study (16)  
and review papers (5) screened, n=21

Studies and reviews from  
reference lists and citing papers  
(using Web of Knowledge and  
Google Scholar), n=40

Excluded systematic,  
n= 4, and 'non-systematic'  
reviews (n=1)

Studies from reference lists of  
new systematic reviews (14),  
n=4

Excluded systematic reviews,  
n=14

### Stage 5

Full text papers screened, n=46

Excluded papers,  
n=30 (Table 1)

Relevant papers (n=16)  
representing (n=14) studies
